# Supplementary material
Source: PubMed Central journal article supplement (PMC5289864)
Supplement: 979FigureS1.pdf [file 979FigureS1.pdf]

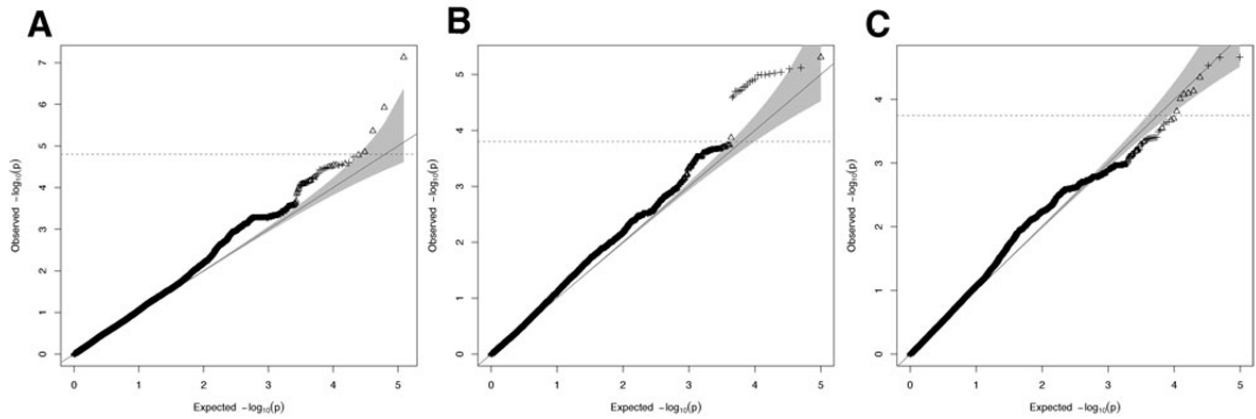

**Figure S1. Quantile-quantile plots for X-chromosome SNP association.** (A) Ankylosing Spondylitis (AS), (B) Coronary Artery Disease (CAD) and (C) Multiple Sclerosis (MS) are shown. X-axis is the expected logarithm of association p-value; Y-axis is the observed logarithm of association p-value; SNPs with increased effect in females are represented with a “triangle”, in males with a “plus”
