# Supplementary material
Source: PubMed Central journal article supplement (PMC5289864)
Supplement: 979TableS1.pdf [file 979TableS1.pdf]

**Table S1. Sample size and genetic markers for WTCCC diseases and for GIANT anthropometric traits**

| Disease | prev | sample size |         | N M GW SNPs | N F GW SNPs |
|---------|------|-------------|---------|-------------|-------------|
|         | M:F  | N M         | N F     |             |             |
| AS      | 2:1  | 3,808       | 3,147   | 6,716,144   | 6,716,144   |
| BD      | 1:1  | 1,895       | 2,318   | 4,218,614   | 4,218,614   |
| CAD     | 1:1  | 2,692       | 1,719   | 4,216,112   | 4,216,112   |
| CD      | 1:1  | 1,899       | 2,303   | 4,225,560   | 4,225,560   |
| HT      | 1:1  | 1,992       | 2,402   | 4,212,155   | 4,212,155   |
| MS      | 1:3  | 5,307       | 9,092   | 6,716,144   | 6,716,144   |
| RA      | 1:2  | 1,727       | 2,599   | 4,216,383   | 4,216,383   |
| T1D     | 3:2  | 2,198       | 2,214   | 4,210,551   | 4,210,551   |
| T2D     | 1:1  | 2,276       | 2,033   | 4,221,690   | 4,221,690   |
| BMI     | -    | 152,893     | 171,977 | 2,477,631   | 2,494,585   |
| HIP     | -    | 94,790      | 118,528 | 2,213,803   | 2,466,815   |
| HIP-a   | -    | 93,965      | 117,340 | 2,188,856   | 2,466,815   |
| WC      | -    | 104,406     | 127,998 | 2,302,005   | 2,444,355   |
| WC-a    | -    | 104,079     | 127,470 | 2,294,966   | 2,473,036   |
| WHR     | -    | 94,434      | 118,004 | 2,207,530   | 2,466,102   |
| WHR-a   | -    | 93,480      | 116,742 | 2,146,137   | 2,467,779   |
| HEIGHT  | -    | 60,586      | 73,137  | 2,762,772   | 2,748,520   |
| WEIGHT  | -    | 58,351      | 67,594  | 2,760,764   | 2,746,981   |

Abbreviations: prev ratio in prevalence; N M: male number; N F: female number; N M GW SNPs genome-wide SNPs available for male dataset; N F GW SNPs genome-wide SNPs available for female dataset
