# Supplementary material
Source: PubMed Central journal article supplement (PMC5289864)
Supplement: 979TableS2.pdf [file 979TableS2.pdf]

---

**Table S2. Androgen-responsive genes from ARGDB<sup>38</sup>**

---

**Androgen-responsive gene**

---

ACO2  
AP1B1  
APOBEC3B  
ARFGAP3  
ARVCF  
ATP6V1E1  
ATXN10  
CELSR1  
CHCHD10  
CLDN5  
CPT1B  
CRELD2  
DDT  
DGCR11  
FAM118A  
FBLN1  
FBXO7  
GAL3ST1  
GAS2L1  
GCAT  
GGT1  
GSTT1  
GSTT2  
H1F0  
HMOX1  
KDEL3  
LGALS1  
MAPK1  
MB  
MCHR1  
MCM5  
MFNG  
MGAT3  
MIF  
MKL1

MMP11  
MN1  
MPST  
NF2  
NHP2L1  
PACSIN2  
PATZ1  
PISD  
PMM1  
PPARA  
PRAME  
PRR5  
PVALB  
RBX1  
RIBC2  
RPL3  
RRP7A  
SEC14L2  
SERHL2  
SFI1  
SLC25A1  
SREBF2  
ST13  
SYNGR1  
TIMP3  
TNRC6B  
TRABD  
TSPO  
TST  
TTLL12  
TUBGCP6  
TUG1  
UFD1L  
XBP1  
YPEL1  
YWHAH  
ZMAT5

ABCG1  
ADAMTS1  
ADAMTS5  
ADARB1  
AGPAT3  
APP  
ATP5O  
BRWD1  
BTG3  
CBR1  
CBS  
CCT8  
CLDN8  
COL6A1  
CSTB  
DIP2A  
DYRK1A  
HSPA13  
IL10RB  
LSS  
MORC3  
MRPL39  
MRPS6  
NRIP1  
PDE9A  
PDXK  
PFKL  
PIGP  
RIPK4  
RUNX1  
SIM2  
SYNJ1  
TFF1  
TIAM1  
TMEM50B  
TMPRSS2  
TRPM2

ACSS1  
ACSS2  
ADRA1D  
ADRM1  
AHCY  
BCL2L1  
BMP2  
BMP7  
CD40  
CDC25B  
CEBPB  
CRLS1  
CSNK2A1  
CST11  
CST3  
CST8  
CTSZ  
CYP24A1  
DNTTIP1  
DUSP15  
EDEM2  
EEF1A2  
ELMO2  
EYA2  
GDF5  
GGTLC1  
GNRH2  
HRH3  
ID1  
IDH3B  
JAG1  
LAMA5  
MACROD2  
MAFB  
MMP9  
NCOA3  
NFATC2

NNAT  
PAK7  
PCK1  
PCNA  
PDYN  
PLCB1  
PMEPA1  
PRNP  
PSMA7  
PTGIS  
PXMP4  
PYGB  
RIN2  
RNF114  
RPN2  
RPS21  
RRBP1  
SAMHD1  
SDC4  
SEC23B  
SLC12A5  
SLPI  
SMOX  
SNAI1  
SNAP25  
SNPH  
SNTA1  
SPINT4  
SPTLC3  
TGM2  
THBD  
UBE2C  
VAPB  
WISP2  
ZBP1  
ACP5  
ACPT

AKT2  
ANGPTL4  
AP2S1  
APOC1  
APOE  
ATP1A3  
ATP5D  
BAX  
BCAM  
BCAT2  
BST2  
C3  
CACNA1A  
CALR  
CAPNS1  
CARD8  
CCDC97  
CCNE1  
CD37  
CEACAM1  
CEBPA  
CFD  
CHAF1A  
CHERP  
CKM  
CLEC11A  
COL5A3  
CRB3  
CRLF1  
CSNK1G2  
CXCL17  
CYP4F12  
CYP4F8  
DAPK3  
DBP  
DPF1  
ECH1

EGLN2  
EIF3K  
ELSPBP1  
ERF  
ETFB  
F2RL3  
FAM32A  
FARSA  
FCER2  
FCGRT  
FPR1  
FTL  
FUT3  
FUT6  
FXVD3  
GADD45B  
GAMT  
GDF15  
GIPR  
GPX4  
GRWD1  
GSK3A  
HMG20B  
HSD17B14  
ICAM1  
ICAM3  
IFI30  
INSR  
ISYNA1  
JAK3  
JUNB  
KCNN4  
KLK10  
KLK11  
KLK13  
KLK14  
KLK15

KLK2  
KLK3  
KLK4  
KLK6  
KLK7  
KLKP1  
LDLR  
LGALS7  
LHB  
LIPE  
LRG1  
LSM4  
MAP3K10  
MAP4K1  
MYBPC2  
NCAN  
NDUFA7  
NFIX  
NUCB1  
NUDT19  
PDCD5  
PDE4C  
PEG3  
PIN1  
PLD3  
PLEKHJ1  
PPAP2C  
PRKACA  
PRMT1  
PSMC4  
PSMD8  
PTBP1  
PTOV1  
RAB3A  
RAB4B  
RAD23A  
RANBP3



RETN  
RPL18A  
RPL28  
RPS28  
RRAS  
SCAF1  
SCN1B  
SEPW1  
SGTA  
SHANK1  
SIN3B  
SLC1A5  
SLC25A23  
SULT2A1  
SYMPK  
TBXA2R  
TGFB1  
TMED1  
TMEM205  
TNNT1  
TNPO2  
TRIM28  
UBA52  
USF2  
VAV1  
ZIK1  
ZNF350  
ZNF432  
ZNF550  
ZNF552  
ZNF569  
ZNF93  
ADCYAP1  
ATP5A1  
B4GALT6  
BCL2  
CDH19

CDH2  
CNDP2  
COLEC12  
CYB5A  
DSC2  
DSG2  
GALR1  
LIPG  
LMAN1  
LPIN2  
MALT1  
MAPRE2  
MBP  
NEDD4L  
NPC1  
PMAIP1  
PTPRM  
RNF125  
ROCK1  
SEC11C  
SERPINB3  
SERPINB4  
SERPINB5  
SIGLEC15  
SMAD2  
SMAD7  
SMCHD1  
SOCS6  
SYT4  
TXNL1  
TYMS  
VAPA  
ABCA5  
ABCC3  
ACACA  
ACADVL  
ACBD4

ACE  
ACLY  
ADORA2B  
AKAP1  
AP2B1  
APPBP2  
ASGR1  
ATP1B2  
ATXN7L3  
B3GNTL1  
BAIAP2  
BIRC5  
BLMH  
BRIP1  
C17ORF80  
CACNA1G  
CACNG4  
CCL16  
CCL2  
CCL3  
CCL4  
CCL5  
CCL7  
CDC6  
CDK5R1  
CLTC  
CNP  
COG1  
COL1A1  
COPS3  
COX11  
CPD  
CRK  
CSH2  
CYB561  
DDX5  
DPH1

DUS1L  
DYNLL2  
EFNB3  
EIF5A  
EPN2  
ERBB2  
ERN1  
FAM104A  
FASN  
FLOT2  
FOXK2  
FXR2  
G6PC3  
GALR2  
GGNBP2  
GOSR1  
GPS1  
GRN  
HEATR6  
HN1  
HOXB13  
HOXB2  
HOXB6  
HSD17B1  
IGFBP4  
INPP5K  
JUP  
KIF1C  
KRT14  
KRT15  
KRT19  
KRT37  
LGALS3BP  
LRRC59  
MAFG  
MAP2K4  
MAPT

MIF4GD  
MMD  
MRPL27  
MYH10  
MYH2  
MYH4  
MYL4  
MYO1C  
NAGS  
NCOR1  
NME1  
NME2  
NOG  
NPTX1  
NR1D1  
P2RX1  
P4HB  
PCTP  
PDK2  
PEMT  
PFN1  
PHB  
PNMT  
PPM1D  
PSMB6  
PSMC5  
PSMD11  
PYCR1  
RARA  
RASD1  
RPL19  
RPL27  
RPRML  
RPS6KB1  
RUNDC3A  
SIRT7  
SLC16A3

SLC16A6  
SLC25A10  
SLC2A4  
SLC35B1  
SMTNL2  
SOCS3  
SOCS7  
SOX9  
SPHK1  
SPNS2  
SREBF1  
ST6GALNAC2  
STAT5A  
SUPT6H  
THRA  
TIMP2  
TLCD2  
TNS4  
TOB1  
TOP2A  
TP53  
TRPV3  
UBE2G1  
UBTF  
UNC119  
WIPI1  
WSB1  
YWHAE  
ZNHIT3  
ABCC1  
ACSM3  
ADAMTS18  
ALDOA  
ARL6IP1  
ATMIN  
ATP2A1  
BCAR1

BCKDK  
BFAR  
C16ORF3  
CDH1  
CDH3  
CENPN  
CES3  
CFDP1  
CREBBP  
CRISPLD2  
CX3CL1  
CYB5B  
CYLD  
DNAH3  
DPEP1  
DPEP3  
DYNC1LI2  
EMP2  
FBXL16  
GCSH  
GDE1  
GOT2  
GSPT1  
HAGH  
HCFC1R1  
HERPUD1  
HP  
HSD11B2  
HSD17B2  
HSD3B7  
IRX3  
KIF22  
KREMEN2  
LITAF  
MAF  
MAPK3  
MBTPS1

MC1R  
MMP2  
MT1X  
MVD  
NDUFB10  
NQO1  
NTAN1  
NUDT16L1  
NUTF2  
OSGIN1  
PAQR4  
PDXDC1  
PHKG2  
PLLP  
POLR2C  
PRSS8  
PSMB10  
PYCARD  
RBL2  
RHBDF1  
SLC7A5  
SOX8  
SULT1A1  
SYT17  
TAT  
TCF25  
TERF2IP  
TGFB11  
TMC5  
TRAP1  
TUBB3  
UQCRC2  
ZC3H7A  
ZCCHC14  
ABHD2  
ACAN  
ADAM10



AEN  
AKAP13  
ALDH1A2  
ALDH1A3  
ANXA2  
AP3B2  
AQP9  
ARRDC4  
B2M  
C15ORF61  
CA12  
CATSPER2  
CCNB2  
CHAC1  
CHRNA3  
CHRNA5  
CKMT1B  
CORO2B  
COX5A  
CYP19A1  
ETFA  
FAM103A1  
FAM174B  
FES  
FGF7  
FURIN  
GCHFR  
GNB5  
GRAMD2  
GREM1  
HERC1  
HOMER2  
IDH2  
IGF1R  
ISG20  
LIPC  
LPCAT4

LRRC28  
MAN2A2  
MAP2K1  
MAPK6  
MEF2A  
MESP2  
NEDD4  
NMB  
NOX5  
NTRK3  
PDIA3  
PIAS1  
PML  
PPIB  
PTPN9  
RAB27A  
RASGRP1  
RCCD1  
RHCG  
SEMA4B  
SLC12A1  
SLC27A2  
SLCO3A1  
SMAD3  
SMAD6  
SNAPC5  
SNX1  
SORD  
THBS1  
TLE3  
TSPAN3  
ZFYVE19  
ZNF770  
ACOT1  
ACTN1  
ADAM20  
AHSA1

AKAP5  
AKAP6  
ANG  
AP1G2  
AP4S1  
ARG2  
ATXN3  
BMP4  
BRF1  
CALM1  
CKB  
CPNE6  
DACT1  
DAD1  
DHRS7  
DIO2  
DLST  
EIF2S1  
EIF5  
ERO1L  
ESR2  
EVL  
FAM177A1  
FNTB  
FOS  
GCH1  
HSP90AA1  
HSPA2  
KIAA0247  
LGALS3  
LTB4R  
MGAT2  
MNAT1  
MTA1  
MTHFD1  
NEDD8  
NFKBIA

NID2  
NPC2  
PAX9  
PELI2  
PGF  
PLEKHG3  
PPM1A  
PRKCH  
PRKD1  
PSEN1  
PSMA3  
PSMA6  
PSMB5  
PSME1  
PTPN21  
PYGL  
RAB15  
RDH11  
REM2  
RNASE9  
RPS29  
RTN1  
SCFD1  
SEL1L  
SERPINA12  
SERPINA5  
SIPA1L1  
STON2  
SYNE2  
TEP1  
THTPA  
TMED10  
ZFP36L1  
ABCC4  
ADPRHL1  
AKAP11  
ALOX5AP

ATP11A  
ATXN8OS  
BRCA2  
CCDC70  
CDK8  
COL4A1  
DCLK1  
DNAJC15  
DNAJC3  
EFNB2  
EPSTI1  
FARP1  
FOXO1  
FREM2  
GAS6  
GTF2F2  
HSPH1  
IRS2  
ITM2B  
LCP1  
NDFIP2  
NUPL1  
PDS5B  
POLR1D  
POSTN  
SPATA13  
SUGT1  
TM9SF2  
TPP2  
TPT1  
TSC22D1  
UBL3  
UFM1  
ZC3H13  
ZIC2  
A2M  
A2ML1

ABCB9  
ABCD2  
ADIPOR2  
ALDH2  
AMIGO2  
ANAPC5  
AQP5  
ARF3  
ARHGDIB  
ARL1  
ARPC3  
ASCL1  
ATF7  
ATP2A2  
ATP2B1  
ATP5B  
ATP6V0A2  
AVPR1A  
B4GALNT1  
BCAT1  
BCL7A  
BTG1  
CACNA1C  
CACNB3  
CAMKK2  
CCND2  
CCT2  
CD63  
CD9  
CDK2  
CDK4  
CDKN1B  
CHD4  
CHPT1  
COPS7A  
CPSF6  
CUX2

DAZAP2  
DCN  
DNM1L  
DTX3  
DUSP6  
ELK3  
EMP1  
ENO2  
EPS8  
EPYC  
ERGIC2  
ERP29  
FAR2  
FBXO21  
FGD4  
FKBP11  
GAPDH  
GNB3  
GOLT1B  
GPD1  
GPRC5A  
GRIP1  
GTF2H3  
GUCY2C  
HOXC5  
HOXC6  
HSP90B1  
IGF1  
KCNA5  
KIF21A  
KLRD1  
KRAS  
KRT1  
KRT18  
KRT5  
KRT6A  
KRT71

KRT73  
KRT8  
LHX5  
LIMA1  
LRP1  
LRP6  
LTBR  
LUM  
MARS  
MDM2  
MED13L  
MFAP5  
MGP  
MGST1  
MPHOSPH9  
MRPL51  
MSRB3  
MVK  
MYBPC1  
MYL2  
NOC4L  
NOS1  
NR4A1  
NUDT4  
OAS2  
OLR1  
PA2G4  
PAWR  
PEX5  
PHC1  
PHLDA1  
PPP1R12A  
PRKAG1  
PTGES3  
PTHLH  
PTPRO  
PXMP2



RAB3IP  
RAN  
RAPGEF3  
RARG  
RASAL1  
RASSF9  
RND1  
RPLP0  
RPS26  
SCARB1  
SCNN1A  
SENP1  
SETD8  
SHMT2  
SLC16A7  
SLC2A3  
SLC38A1  
SLC38A2  
SLC38A4  
SLCO1B1  
SMARCD1  
SOAT2  
SOCS2  
SP1  
SPPL3  
STRAP  
SUOX  
TBK1  
TMED2  
TMEM106C  
TNFRSF1A  
TPI1  
TRAFD1  
TSPAN8  
TUBA1A  
TUBA1B  
UBC

ULK1  
VDR  
XPOT  
YEATS4  
ACAT1  
ACTN3  
ADM  
AHNAK  
AMOTL1  
AP2A2  
APOA1  
ARCN1  
ASRGL1  
ATM  
BANF1  
BDNF  
BIRC2  
BIRC3  
CASP12  
CAT  
CCND1  
CD151  
CD3E  
CD44  
CD5  
CDK2AP2  
CDKN1C  
CFL1  
CHRM1  
CHST1  
COPB1  
COX8A  
CPT1A  
CRYAB  
CSRP3  
CST6  
CTSC

CTSD  
DDX6  
DKK3  
DRD4  
DTX4  
E2F8  
EI24  
EIF3M  
ELF5  
EML3  
ENDOD1  
EPS8L2  
ESRRA  
F2  
FADD  
FADS1  
FAU  
FDX1  
FKBP2  
FOLH1  
FOLR2  
FOSL1  
FSHB  
FTH1  
FUT4  
FZD4  
GSTP1  
H19  
HBB  
HRAS  
HSD17B12  
HSPA8  
HYOU1  
IFITM1  
IFITM2  
IFITM3  
IGF2

IL18  
IRF7  
JRKL  
KCNE3  
LDHA  
LYVE1  
MAP3K11  
MCAM  
MDK  
MICAL2  
MMP1  
MMP12  
MMP3  
MMP7  
MTA2  
MUC6  
MYOD1  
NAP1L4  
NCAPD3  
NDUFS3  
NOX4  
NUCB2  
NUP160  
OR8D4  
PANX1  
PCF11  
PCNXL3  
PDE3B  
PEX16  
PGA3  
PGM2L1  
PGR  
PHLDA2  
PICALM  
PIK3C2A  
PLA2G16  
PLEKHA7

PLEKHB1  
POLD4  
PPP2R5B  
PRDX5  
PRSS23  
PSMA1  
PSMC3  
PTPMT1  
PTS  
RAD9A  
ROM1  
RPLP2  
RRM1  
SCGB2A1  
SCGB2A2  
SDHD  
SERPING1  
SERPINH1  
SLC17A6  
SLC35F2  
SLC37A2  
SLC37A4  
SLC3A2  
SMPD1  
SOX6  
SPCS2  
SPON1  
SSRP1  
ST5  
STARD10  
STIM1  
STIP1  
STT3A  
SYTL2  
TALDO1  
TBRG1  
TH

THRSP  
THYN1  
TIGD3  
TMEM123  
TNNI2  
TNNT3  
TRPM5  
TSKU  
TTC12  
UCP2  
UCP3  
WNT11  
YIF1A  
ZBTB16  
ZDHHC13  
ABCC2  
ABLIM1  
ACADSB  
ADD3  
ADK  
ADRA2A  
AKR1C1  
AKR1C2  
AKR1C3  
ANKRD1  
ANXA7  
AP3M1  
ARID5B  
ASB13  
ATE1  
BAG3  
BAMBI  
BMPR1A  
BNIP3  
CAMK2G  
CASP7  
CISD1

CPXM2  
CREM  
CUZD1  
CYP17A1  
DCLRE1A  
DDIT4  
DDX21  
DKK1  
DNMBP  
DUSP5  
EIF4EBP2  
ELOVL3  
ENTPD1  
FAS  
FGF8  
FGFR2  
FRAT1  
GATA3  
GLRX3  
GLUD1  
GOT1  
GSTO1  
HELLS  
IDI1  
IFIT1  
INPP5A  
ITGB1  
JMJD1C  
KIAA1217  
KIF5B  
LDB3  
LIPA  
MBL2  
MGEA5  
MINPP1  
MSMB  
MXI1

NCOA4  
NET1  
NRP1  
OAT  
P4HA1  
PCBD1  
PDLIM1  
PDSS1  
PFKFB3  
PFKP  
PGAM1  
PHYH  
PIK3AP1  
PLAU  
PLEKHA1  
PNLIPRP1  
PPA1  
PSAP  
PTEN  
RBP4  
RGS10  
RPS24  
RRP12  
RSU1  
SCD  
SEC61A2  
SFMBT2  
SGMS1  
SGPL1  
SLC29A3  
SVIL  
TFAM  
TIMM23  
TM9SF3  
USP54  
VCL  
VDAC2



ZDHHC6  
ZEB1  
ZMIZ1  
ZWINT  
ABCA1  
ACO1  
AGPAT2  
AK3  
ALDH1A1  
ALG2  
ANGPTL2  
ANXA1  
AQP3  
ATP6V1G1  
B4GALT1  
BICD2  
BNC2  
CBWD1  
CD274  
CDC14B  
CDKN2A  
CHMP5  
CLTA  
CRAT  
CTSL  
DBH  
DCTN3  
DDX31  
DNAJA1  
DNM1  
ENDOG  
EPB41L4B  
EXOSC2  
GADD45G  
GALT  
GLDC  
GNE

GOLM1  
GSN  
HEMGN  
HSD17B3  
HSDL2  
HSPA5  
IFNA1  
IFNA13  
INSL6  
INVS  
KLF4  
LCN2  
LPAR1  
LRRC8A  
MTAP  
NANS  
NFIB  
NFIL3  
NOTCH1  
NPR2  
NR4A3  
NR6A1  
OMD  
ORM1  
ORM2  
PALM2-AKAP2  
PAPPA  
PDCL  
PLAA  
PMPCA  
POLR1E  
PPP6C  
PSAT1  
PSMD5  
PTCH1  
PTGDS  
PTGR1

PTGS1  
RAB14  
RALGPS1  
RFK  
RGS3  
RLN2  
RMRP  
RPL12  
RRAGA  
SEC61B  
SLC1A1  
SLC25A25  
SLC27A4  
SLC31A1  
SLC44A1  
SNAPC3  
STOM  
STXBP1  
SURF4  
SYK  
TEK  
TMEM141  
TNC  
TPM2  
TRAF2  
UBE2R2  
UBQLN1  
UCK1  
UGCG  
UNC13B  
VCP  
XPA  
ZBTB26  
ZBTB43  
ZCCHC6  
ZFAND5  
ZNF189

ADAM7  
ADAM9  
ADCY8  
ADHFE1  
ADRA1A  
ADRB3  
AGPAT5  
ANGPT1  
ANK1  
ASAH1  
ASPH  
ATAD2  
ATP6V1B2  
ATP6V1H  
AZIN1  
BNIP3L  
BRF2  
C8ORF76  
CA2  
CALB1  
CCNE2  
CEBPD  
CLU  
COX6C  
CRH  
CTSB  
CYC1  
CYP7B1  
DEFB1  
DGAT1  
DOCK5  
DPYSL2  
DUSP4  
EGR3  
EIF4EBP1  
ENPP2  
EPHX2

EPPK1  
FABP4  
FABP5  
FAM110B  
FAM84B  
FDFT1  
FGFR1  
FZD6  
GNRH1  
GPR20  
GRINA  
GSR  
GTF2E2  
INTS10  
KCNU1  
KCNV1  
KHDRBS3  
KLF10  
LACTB2  
LEPROTL1  
LONRF1  
LPL  
LY6E  
MATN2  
MCM4  
MMP16  
MTMR9  
MYC  
MYOM2  
NACAP1  
NAT1  
NAT2  
NCALD  
NCOA2  
NDRG1  
NDUFB9  
NKX3-1

NUDT18  
OSR2  
PABPC1  
PAG1  
PLAT  
PNOC  
POLR3D  
POP1  
PPAPDC1B  
PPP2CB  
PPP2R2A  
PSCA  
PUF60  
RAB11FIP1  
RAB2A  
RAD21  
RAD54B  
RECQL4  
RIMS2  
RPL30  
RPL8  
RPS20  
SDCBP  
SFRP1  
SFTPC  
SGK3  
SNAI2  
SPAG11B  
SQLE  
ST3GAL1  
STAR  
STK3  
TCEB1  
TERF1  
TMEM65  
TNFRSF11B  
TPD52

TRAM1  
TRIB1  
TRPS1  
TSTA3  
TTPA  
UBXN8  
YWHAZ  
ZBTB10  
ZC3H3  
ZFHX4  
ZNF395  
ABCB4  
ACHE  
ACTB  
ACTR3B  
AGR2  
AHR  
AKAP9  
AKR1D1  
AQP1  
ARPC1B  
ASB10  
ATXN7L1  
AZGP1  
BET1  
C7ORF43  
CALCR  
CALD1  
CALU  
CAPZA2  
CASP2  
CAV2  
CD36  
CDK6  
CHCHD2  
CLCN1  
CLDN12

CLDN3  
COBL  
COL1A2  
CPA4  
CREB3L2  
CRHR2  
CROT  
CUX1  
CYCS  
CYP3A5  
DDC  
DLD  
DNAJB9  
DOCK4  
DPP6  
EGFR  
ELN  
ETV1  
FAM115A  
FASTK  
FIS1  
FSCN1  
FZD1  
GAL3ST4  
GLI3  
GPNMB  
GRB10  
GUSB  
HIBADH  
HIPK2  
HOXA10  
HOXA13  
HOXA2  
HOXA5  
HOXA9  
HSPB1  
IFRD1



IGFBP1  
IGFBP3  
IL6  
INHBA  
INMT  
INSIG1  
ITGB8  
KDEL2  
LEP  
LIMK1  
LRCH4  
MCM7  
MDH2  
MET  
MGC27345  
MKLN1  
MRPS33  
NAMPT  
NDUFA5  
NDUFB2  
NPY  
NRF1  
PCOLCE  
PDIA4  
PEG10  
PIP  
PON1  
PPIA  
PRKAR2B  
PTN  
PURB  
RAC1  
RAMP3  
RPA3  
SEC61G  
SEMA3C  
SERPINE1

SFRP4  
SHH  
SKAP2  
SLC4A2  
SMARCD3  
SND1  
ST7  
STAG3  
STEAP2  
STEAP4  
TARP  
TBRG4  
TES  
TFPI2  
TMED4  
TRA2A  
TRPV6  
TWIST1  
WBSCR28  
WIPF3  
XRCC2  
YWHAG  
ZNF117  
ZNF273  
ZNF680  
ZNF862  
ZNRF2  
ACAT2  
AIM1  
AKAP12  
AMD1  
ANKRD6  
ATXN1  
BACH2  
BAK1  
BCKDHB  
C6ORF201

CCND3  
CDKN1A  
CDYL  
CITED2  
CRIP3  
CRISP1  
CRISP3  
CTGF  
DEF6  
DLL1  
DOPEY1  
DSE  
DSP  
DST  
DYNLT1  
ECHDC1  
EDN1  
EEF1A1  
EEF1E1  
ELOVL5  
ENPP1  
ENPP5  
EPB41L2  
ESR1  
EZR  
F13A1  
FABP7  
FANCE  
FKBP5  
FKBPL  
FOXC1  
FOXQ1  
GLO1  
GMDS  
GPR115  
GPR126  
GSTA3

GTF3C6  
GTPBP2  
HEBP2  
HIST1H1C  
HIST1H3J  
HLA-C  
HSP90AB1  
ID4  
IFNGR1  
ITPR3  
LAMA4  
MAP7  
MAPK14  
MARCKS  
MAS1  
ME1  
MOCS1  
MRPL14  
NRN1  
NT5DC1  
NT5E  
PBOV1  
PDCD2  
PEX6  
PGC  
PGM3  
PIM1  
PKIB  
PLA2G7  
PLAGL1  
PNRC1  
PPARD  
PREP  
PRL  
PSMB1  
PTP4A1  
SEC63

SERINC1  
SESN1  
SGK1  
SLC22A2  
SLC22A3  
SLC22A7  
SLC29A1  
SLC35F1  
SNAP91  
SOD2  
SPDEF  
SSR1  
STX7  
TBC1D22B  
TDRG1  
TJAP1  
TNFAIP3  
TPD52L1  
TPMT  
TRDN  
TUBB2A  
TUBB2B  
TULP4  
UBE2J1  
UST  
VEGFA  
VTA1  
ZDHHC14  
ABLIM3  
ADRA1B  
ADRB2  
ANKH  
ANXA6  
AP3S1  
ARHGAP26  
ARRDC3  
CANX

CARTPT  
CAST  
CCNB1  
CCNG1  
CCNO  
CD14  
CD180  
CD74  
CDO1  
CLTB  
CNOT8  
COX7C  
CPEB4  
CRHBP  
CSNK1A1  
CTNND2  
CYFIP2  
DHFR  
DNAH5  
DUSP1  
EFNA5  
EGR1  
ELL2  
ELOVL7  
EPB41L4A  
ERCC8  
F2R  
FAM105A  
FBXL7  
FGF1  
FGF10  
FGF18  
FST  
FYB  
GABRA1  
GFRA3  
GHR

GM2A  
GOLPH3  
GPX3  
GPX8  
GRIA1  
GZMA  
HARS2  
HINT1  
HMGCR  
HMGCS1  
HMMR  
HOMER1  
HSD17B4  
HSPA4  
HSPA9  
HTR1A  
IL12B  
IL5  
IQGAP2  
IRF1  
ISOC1  
ITGA2  
KCNN2  
KIAA0141  
LIFR  
LMAN2  
LNPEP  
LOC728554  
MAST4  
MCCC2  
MSH3  
MXD3  
NPR3  
NR2F1  
NR3C1  
OCLN  
PAIP1

PAIP2  
PART1  
PCSK1  
PCYOX1L  
PDE4D  
PDE6A  
PIK3R1  
PJA2  
PLK2  
PPAP2A  
PPIC  
PPP2CA  
PRLR  
PTGER4  
PTTG1  
PURA  
RAD1  
RAD50  
RAI14  
REEP5  
RNF14  
RNF145  
RPS23  
SAP30L  
SAR1B  
SEC24A  
SEMA5A  
SEPP1  
SIL1  
SKP2  
SLC12A2  
SLC12A7  
SLC1A3  
SLC22A4  
SLC22A5  
SLC26A2  
SLIT3



SNX2  
SPARC  
SQSTM1  
SRD5A1  
SRP19  
SSBP2  
STK10  
SUB1  
TARS  
TBC1D9B  
TCF7  
TERT  
TGFBI  
TICAM2  
TMEM173  
TNFAIP8  
TRIM23  
TRIO  
UBE2B  
UBLCP1  
VCAN  
WWC1  
ZCCHC9  
ZFR  
ABCE1  
ACSL1  
ADRA2C  
AFF1  
ALB  
ANAPC10  
ANKRD37  
ANTXR2  
ANXA3  
AREG  
ART3  
ASB5  
ATP8A1

BMPR1B  
C4ORF19  
CASP3  
CASP6  
CCNA2  
CCNG2  
CCNI  
CISD2  
CLCN3  
CORIN  
CPE  
CTBP1  
CXCL1  
CXCL10  
CXCL2  
CXCL3  
CYP2U1  
DKK2  
EGF  
ELOVL6  
EPGN  
EREG  
FAM184B  
FBXW7  
FGF2  
FGFBP1  
FGFR3  
FGG  
FHDC1  
FIP1L1  
G3BP2  
GRIA2  
GRSF1  
GUCY1A3  
H2AFZ  
HERC3  
HERC6

HOPX  
HPGD  
HS3ST1  
HTT  
IBSP  
IL15  
INPP4B  
KDR  
KIAA0232  
LAP3  
LEF1  
LIMCH1  
LNX1  
LRBA  
LSM6  
MAP9  
MED28  
MRFAP1  
MTNR1A  
MYOZ2  
NFKB1  
NMU  
NPY1R  
PALLD  
PDE5A  
PDGFRA  
PDLIM5  
PF4  
PGM2  
PKD2  
PLAC8  
PLK4  
PPP3CA  
RAB28  
RAB33B  
RBPJ  
RPL9

RPS3A  
S100P  
SCARB2  
SEC24D  
SHROOM3  
SLC30A9  
SLC4A4  
SLC7A11  
SMAD1  
SNCA  
SNX25  
SOD3  
SPARCL1  
SPCS3  
SPP1  
SULT1B1  
SULT1E1  
TBC1D1  
TDO2  
TLR2  
TMEM184C  
TMEM33  
UBE2D3  
UGDH  
UGT2B10  
UGT2B11  
UGT2B15  
UGT2B17  
UGT2B28  
USO1  
USP38  
VEGFC  
WDR19  
WWC2  
ABCC5  
ACAA1  
ACPP

ACY1  
ADIPOQ  
AGTR1  
AHSG  
ALAS1  
ALCAM  
ANAPC13  
ANKRD28  
APOD  
ARF4  
ARHGEF3  
ATP13A3  
ATP1B3  
BCHE  
BDH1  
BTD  
C3ORF58  
CACNA1D  
CAMP  
CAV3  
CCDC80  
CCNL1  
CD86  
CDC25A  
CEP70  
CHL1  
CHST2  
CIDEA  
CLDN11  
CLEC3B  
CNOT10  
COX17  
CPOX  
CSPG5  
CTNNA1  
DALRD3  
DCBLD2

DLG1  
EAF2  
EDEM1  
EHHADH  
EIF4A2  
EIF4G1  
EPHB1  
FLNB  
FNDC3B  
FSTL1  
GATA2  
GFM1  
GNAI2  
GNAT1  
GPX1  
HACL1  
HDAC11  
HIGD1A  
IFT122  
IL1RAP  
IMPDH2  
ITPR1  
KALRN  
KLHDC8B  
KPNA1  
LPP  
LRIG1  
LRRC58  
LRRFIP2  
LRRN1  
MGLL  
MLF1  
MME  
MUSTN1  
NAT6  
NGLY1  
NISCH

NT5DC2  
OSBPL11  
P2RY14  
PARP9  
PCBP4  
PDHB  
PDIA5  
PDZRN3  
PFN2  
PHF7  
PHLDB2  
PIK3R4  
PLOD2  
PLSCR1  
PLXND1  
PPARG  
PRKCD  
PSMD6  
PTPN23  
PTPRG  
RAB7A  
RBP1  
RFC4  
RFTN1  
RHOA  
RNF13  
RPL15  
RPL22L1  
RPN1  
RPSA  
RYBP  
SCAP  
SEC13  
SEC22C  
SEC61A1  
SELK  
SEMA3F

SEMA3G  
SERP1  
SERPINI1  
SLC15A2  
SLC33A1  
SLC41A3  
SLCO2A1  
SMARCC1  
SNRK  
SPINK8  
SRPRB  
SSR3  
SST  
TBL1XR1  
TGM4  
THRB  
TIMP4  
TIPARP  
TKT  
TM4SF1  
TNK2  
TP63  
TRAIP  
TSC22D2  
UBA5  
UBE2E1  
VIPR1  
XPC  
ACADL  
ACSL3  
ACTG2  
ACTR2  
ACTR3  
ACVR1  
ACYP2  
ADI1  
AGPS



ALPI  
ANKRD44  
ANO7  
ANXA4  
ARL4C  
ARPC2  
ASAP2  
ATAD2B  
BARD1  
BIN1  
BZW1  
CAD  
CASP10  
CASP8  
CCNT2  
CCT4  
CD28  
CFLAR  
CGREF1  
CHPF  
COL3A1  
COL5A2  
COMMD1  
COQ10B  
CREB1  
CYBRD1  
CYP27A1  
DBI  
DNAJC10  
DNER  
DPP4  
DQX1  
DUSP11  
EGR4  
EIF2AK2  
EPAS1  
EPHA4

FAM84A  
FHL2  
FKBP7  
FN1  
FOSL2  
GGCX  
GORASP2  
GPC1  
GPD2  
GPR1  
GRB14  
GREB1  
GRHL1  
HADHB  
HDLBP  
HES6  
HOXD13  
ID2  
IDH1  
IGFBP2  
IGFBP5  
IL1A  
IL1B  
IL1R1  
IL1R2  
INHBB  
INPP1  
IRS1  
ITGAV  
KHK  
KIF3C  
KIF5C  
KRCC1  
LAPTM4A  
LCT  
LHCGR  
LIMS1

LPIN1  
LTBP1  
MAL  
MAT2A  
MBOAT2  
MCEE  
MCM6  
MERTK  
MPHOSPH10  
MRPL30  
MRPL33  
MSTN  
MTHFD2  
MYL1  
MYO1B  
NCL  
NCOA1  
NEU2  
NR4A2  
NRP2  
OBSL1  
ODC1  
PDE6D  
PDIA6  
PHOSPHO2  
PIGF  
PLEKHA3  
PLEKHB2  
PNKD  
PNO1  
POMC  
PPIL3  
PPM1G  
PPP1CB  
PPP3R1  
PSMD1  
PTPN18

PXDN  
RAB10  
RAB17  
RAB1A  
RAB3GAP1  
RALB  
RBMS1  
REEP1  
RHOB  
ROCK2  
RPL37A  
RSAD2  
SCG2  
SDC1  
SDPR  
SERPINE2  
SF3B1  
SFTPB  
SIX2  
SLC39A10  
SLC40A1  
SLC4A3  
SLC8A1  
SLC9A2  
SMYD5  
SNRPG  
SOS1  
SOX11  
SP100  
SP110  
SP140  
SRD5A2  
ST3GAL5  
STAT4  
STK39  
SUCLG1  
TFPI

TIA1  
TLK1  
TMEFF2  
TMEM37  
TPO  
TRPM8  
TXNDC9  
UGT1A1  
UGT1A3  
UPP2  
XIRP2  
XPO1  
ZEB2  
ZFP36L2  
ABCD3  
ACBD6  
ACOT7  
ACP6  
ACTA1  
ACTN2  
ADIPOR1  
AGT  
AGTRAP  
AIDA  
ALDH4A1  
ALPL  
AMPD1  
ANP32E  
ANXA9  
ARF1  
ARHGAP29  
ARNT  
ASAP3  
ATF3  
ATP1A1  
ATP1A2  
ATP1B1

ATP2B4  
ATP6V0B  
BAI2  
BCAR3  
BCL2L15  
C1ORF116  
C1ORF21  
C1ORF35  
CADM3  
CAMK2N1  
CAP1  
CAPZB  
CASQ2  
CCT3  
CD2  
CD46  
CD52  
CD53  
CD55  
CDA  
CDC42  
CDKN2C  
CELSR2  
CHI3L1  
CKS1B  
CLK2  
CLSTN1  
CNKSR1  
CPT2  
CRABP2  
CREB3L4  
CSF3R  
CTH  
CTSK  
CYP4B1  
CYR61  
DBT

DCST1  
DCST2  
DEGS1  
DHCR24  
DHRS3  
DIO1  
DISC1  
DISP1  
DNASE2B  
DPM3  
DPT  
ECE1  
ECHDC2  
EFNA1  
EFNA3  
EFNA4  
ELK4  
ELTD1  
ENO1  
ENSA  
EPHX1  
EPRS  
ERRF1  
ESPN  
ETNK2  
EVI5  
EXTL2  
F3  
FABP3  
FAF1  
FASLG  
FBXO28  
FDPS  
FLVCR1  
FMO1  
FMO3  
FMO5

FRRS1  
FUBP1  
G0S2  
GADD45A  
GALE  
GBA  
GBP2  
GBP6  
GJA5  
GJA8  
GJB3  
GLRX2  
GLUL  
GNAI3  
GNPAT  
GPA33  
GPR153  
GSTM1  
GSTM2  
GSTM3  
H6PD  
HMGCL  
HMGCS2  
HNRNPR  
HP1BP3  
HPDL  
HSD11B1  
HSD17B7  
ID3  
IER5  
IFI16  
IL19  
IL6R  
IRF2BP2  
ISG20L2  
JUN  
KCNC4



KCNK1  
KCTD3  
KIAA0319L  
KIF2C  
KISS1  
KMO  
LAMC1  
LEPRE1  
LGALS8  
LPGAT1  
LRRC39  
MACF1  
MAPKAPK2  
MCL1  
MPZL1  
MR1  
MTF2  
MTX1  
MUC1  
MYBPH  
MYOG  
NAV1  
NBL1  
NCDN  
NCF2  
NDUFS2  
NENF  
NFIA  
NGF  
NID1  
NMNAT2  
NPR1  
NUDC  
OBSCN  
OMA1  
PAQR7  
PARK7

PBX1  
PBXIP1  
PDE4B  
PDPN  
PEA15  
PGD  
PHLDA3  
PIAS3  
PIGR  
PIK3R3  
PINK1  
PIP5K1A  
PLA2G2A  
PLEKHA6  
PMVK  
POU2F1  
PRDM2  
PRDX1  
PRDX6  
PRELP  
PRKACB  
PROK1  
PSEN2  
PSMA5  
PSMB2  
PTGER3  
PTGS2  
PTPN14  
RAB3B  
RAB4A  
RAD54L  
RALGPS2  
RAP1GAP  
RASSF5  
REG4  
RGS2  
RGS5

RHOU  
RIT1  
RNF11  
RPL11  
RPL5  
RXRG  
S100A1  
S100A11  
S100A13  
S100A3  
S100A8  
S100A9  
SCCPDH  
SCMH1  
SCP2  
SDC3  
SDHB  
SELENBP1  
SELP  
SERBP1  
SFN  
SHC1  
SLC16A1  
SLC19A2  
SLC25A33  
SLC30A1  
SLC30A2  
SLC30A7  
SLC35D1  
SLC44A5  
SLC45A3  
SLC9A1  
SMYD2  
SNRPE  
SNX7  
SOAT1  
SPHAR

SPRR2A  
SPRR2B  
SPRR3  
SRM  
SSX2IP  
STMN1  
STX12  
SUSD4  
TAGLN2  
TGFB2  
THBS3  
THRAP3  
TINAGL1  
TMEM50A  
TOMM20  
TPM3  
TRAF5  
TRAPPC3  
TRIM11  
TXNIP  
UAP1  
UBE4B  
UBQLN4  
UQCRH  
UTS2  
VTCN1  
WNT4  
XCL1  
YARS  
YRDC  
ZBTB7B
