# Supplementary material
Source: PubMed Central journal article supplement (PMC5289864)
Supplement: 979TableS3.pdf [file 979TableS3.pdf]

---

**Table S3. Estrogen-responsive genes from ERGDB<sup>39</sup>**

---

**Estrogen-responsive gene**

---

ACO2

BIK

BAIAP2L2

COMT

C1QTNF6

DGCR6

LGALS1

LIMK2

LIF

MCM5

PDGFB

PES1

PHF5A

RANBP1

SMARCB1

TCF20

TIMP3

TOP3B

XRCC6

YWHAH

APP

ABCG1

BRWD1

CRYAA

CXADR

CHODL

DSCAM

HUNK

ITGB2

NCAM2

NRIP1

RUNX1

SIM2

TFF1  
TFF3  
TTC3  
ATP9A  
AHCY  
BCL2L1  
BMP2  
BCAS1  
CDH4  
CEBPB  
CSNK2A1  
E2F1  
GDF5  
ID1  
KIF3B  
MYBL2  
PCNA  
PLTP  
PSMA7  
PREX1  
PARD6B  
RALY  
SNRPB  
SEC23B  
SRC  
SNAP25  
TCEA2  
TCF15  
THBD  
TPX2  
UBE2C  
WISP2  
ZNF217  
APOE  
ANGPTL4

ASF1B  
BLVRB  
BSG  
CAPNS1  
CYP2B6  
CEACAM6  
CCNE1  
C19ORF24  
C19ORF33  
CEACAM1  
EPOR  
ERF  
EGLN2  
F2RL3  
FKBP8  
FXD5  
GNG7  
GADD45B  
GDF15  
HCN2  
ICAM1  
IER2  
INSL3  
JUNB  
KIR3DL2  
KLK10  
KLK4  
NOTCH3  
NR2F6  
PRKCSH  
PSMC4  
PSMD8  
PVR  
PDCD5  
SLC1A5

SNRPA  
TGFB1  
USF2  
UHRF1  
UBE2S  
ZFP36  
ZNF17  
ZNF230  
ZNF571  
AQP4  
APCDD1  
BCL2  
CDH2  
LAMA3  
NFATC1  
PMAIP1  
PTPN2  
RBBP8  
RAB31  
SMAD2  
TXNL4A  
ACLY  
ACTG1  
APOH  
ATP2A3  
AKAP1  
AURKB  
ALOX15  
AMZ2  
BIRC5  
BRCA1  
BRIP1  
C1QBP  
CDC6  
CNP

CCL2  
CCL5  
COPS3  
CDK5R1  
COL1A1  
CSF3  
CD300LF  
DDX5  
EIF5A  
ENO3  
ERBB2  
GFAP  
GALK1  
GUCY2D  
H3F3B  
HGS  
HS3ST3A1  
IGFBP4  
ITGA3  
ITGAE  
KPNB1  
KPNA2  
KRT19  
KRT23  
MAP2K6  
MAP2K4  
NME1  
NME2  
NUP88  
NGFR  
PMP22  
PSMB3  
PSMB6  
PSMD11  
PSME3

RAB5C  
RAD51C  
RARA  
RPS6KB1  
RASD1  
RAPGEFL1  
SOX9  
SCARF1  
SOCS3  
SLC16A6  
SYNGR2  
SLC9A3R1  
SSTR2  
SDK2  
SLC35B1  
TK1  
TOP2A  
TP53  
TUBG1  
TOB1  
UBTF  
WNT9B  
WSB1  
AARS  
ABCA3  
AMFR  
ACSM3  
AXIN1  
CDH11  
CREBBP  
CDIPT  
DNASE1  
DNAJA2  
DPEP1  
FOXF1

FOXC2  
GOT2  
HBA1  
HBQ1  
HMOX2  
HSD11B2  
IRX5  
KIF22  
LITAF  
MT1B  
MT1L  
MT1X  
MYH11  
NFATC3  
NUP93  
NETO2  
PLK1  
PKMYT1  
RBBP6  
RBL2  
RPS2  
RAB26  
SPN  
SULT1A1  
SLC7A5  
SF3B3  
SSTR5  
TNFRSF12A  
YPEL3  
ZNF267  
ANXA2  
ARNT2  
ABHD2  
ACTC1  
ANP32A

ALDH1A2  
BUB1B  
CA12  
CYP1A1  
CORO2B  
CSNK1G1  
CYP19A1  
DUT  
FBN1  
FGF7  
GATM  
HDC  
IDH2  
IGF1R  
IPW  
ISG20  
IQGAP1  
LRRC49  
MEF2A  
MYO1E  
MESDC2  
NTRK3  
NDN  
NUSAP1  
NR2F2  
PCSK6  
PPIB  
PRC1  
RAD51  
SMAD6  
SORD  
SPRED1  
THBS1  
ACTN1  
CALM1



DHRS2  
DAD1  
DIO2  
EIF2S1  
EIF5  
EML1  
ERH  
ESR2  
ESRRB  
FOS  
HIF1A  
ITPK1  
MTHFD1  
MAX  
NFKBIA  
NUMB  
NDRG2  
PCK2  
PTGER2  
PNP  
SERPINA3  
SERPINA6  
SERPINA5  
SERPINA1  
SSTR1  
TGFB3  
TEP1  
VRK1  
WARS  
ZFP36L1  
ZFYVE26  
CUL4A  
CCNA1  
EFNB2  
ELF1

FLT1  
FARP1  
GPR18  
GTF3A  
GJB2  
HMGB1  
HTR2A  
ITGBL1  
IRG1  
ITM2B  
KL  
LHFP  
MAB21L1  
NBEA  
POU4F1  
RFC3  
RASA3  
RB1  
SLC7A1  
SPRY2  
TFDP1  
ASCL1  
ACVR1B  
ACVRL1  
BCAT1  
BICD1  
CACNA1C  
CD69  
CCT2  
CDK2AP1  
CCND2  
CDKN1B  
CDK2  
DDIT3  
DUSP6

ENO2  
ERBB3  
FKBP4  
FOXM1  
FGF6  
FOXJ2  
GAPDH  
GALNT4  
GPRC5A  
GLYCAM1  
HOXC6  
HSD17B6  
HIP1R  
HOXC8  
HSPB8  
IFNG  
ITGA5  
ITPR2  
IGF1  
KRT6B  
KRT7  
KRT8  
KITLG  
KCNA5  
KCNJ8  
KRAS  
LUM  
MARS  
MGP  
MVK  
MYF5  
NR4A1  
NTS  
NR2C1  
OLR1

ORMDL2  
PA2G4  
PDE3A  
PKP2  
PTPRO  
PRIM1  
PHLDA1  
PAWR  
RAN  
RFC5  
RERG  
SCNN1A  
SHMT2  
SOCS2  
SLC16A7  
STRAP  
SCARB1  
SYT1  
SLC38A1  
TMPO  
TPI1  
TIMELESS  
TMED2  
UNG  
ULK1  
VAMP1  
VDR  
WNT1  
WNT10B  
WSB2  
XPOT  
ACRV1  
ATP5L  
ADM  
BANF1

CCND1  
CD44  
CTNND1  
CTSD  
CALCA  
CHEK1  
DLG2  
EEF1G  
EHF  
FXVD2  
FEN1  
FTH1  
FGF4  
FUT4  
F2  
H2AFX  
HBG1  
HBG2  
HSPA8  
HYOU1  
IGF2  
LDHA  
LUZP2  
MMP3  
MARK2  
MTNR1B  
NUCB2  
NXF1  
P2RY6  
PGR  
PRSS23  
POLA2  
POU2F3  
RPL27A  
RPS3

RRM1  
RBM14  
SLC22A18AS  
SAA1  
SLC1A2  
SLC3A2  
SPCS2  
STIP1  
SERPING1  
SCT  
SYTL2  
SYT8  
SYT7  
TCN1  
TCIRG1  
TAF10  
VEGFB  
VPS37C  
YIF1A  
ZBTB16  
ADRB1  
ARL3  
AKR1C4  
ADRA2A  
ASB13  
BNIP3  
BAMBI  
BLNK  
CREM  
CXCL12  
CUBN  
CYP26A1  
DOCK1  
DDIT4  
EGR2

FGFR2  
GFRA1  
GOT1  
GSTO1  
HK1  
IDI1  
ITIH2  
IFIT1  
IFIT3  
KLF6  
KIF11  
KCNIP2  
LRRC20  
MAP3K8  
MRC1  
NRP1  
NOLC1  
NPM3  
PFKP  
PGAM1  
PLAU  
PSAP  
PPIF  
PARD3  
RET  
RHOBTB1  
RAB18  
SVIL  
ZNF33A  
ZWINT  
ANXA1  
ANP32B  
ABCA1  
AK1  
AQP3

BAG1  
B4GALT1  
CKS2  
COL15A1  
COL5A1  
COQ4  
C9ORF3  
DNAJA1  
ENG  
FBP1  
FNBP1  
GAS1  
HSPA5  
IARS  
IFNA14  
IFNB1  
KLF4  
LCN2  
MPDZ  
NR4A3  
NFIL3  
OLFM1  
OSTF1  
PGM5  
PTGS1  
PLAA  
PTGES  
PTGDS  
RFX3  
RXRA  
RNF38  
SET  
STXBP1  
SSNA1  
SEC61B



SUSD3  
TNFSF8  
TNC  
TEK  
UGCG  
WNK2  
ARFGEF1  
ARC  
ATAD2  
ADRA1A  
AZIN1  
ANGPT1  
BIN3  
CA2  
CLU  
COX6C  
CRH  
CALB1  
CA13  
DEFA4  
DUSP4  
DLC1  
EGR3  
EIF4EBP1  
ENY2  
FDFT1  
FABP4  
GEM  
GNRH1  
GRHL2  
KLF10  
LY6E  
LPL  
MCM4  
MMP16

MYBL1  
MYC  
MATN2  
NDRG1  
NCOA2  
OPRK1  
PCM1  
PDGFRL  
PLAT  
PTDSS1  
PNOC  
PKIA  
PBK  
PLEKHF2  
SFRP1  
ST3GAL1  
SLA  
SLC7A2  
SQLE  
STAR  
STC1  
STK3  
ST18  
SNAI2  
SOX17  
SLC39A14  
SLC39A4  
TCEA1  
TRPS1  
TNFRSF11B  
TP53INP1  
ZNF703  
ACHE  
ADCY1  
ASNS

ABCB1  
AGR2  
AQP1  
ANLN  
CALCR  
CAV1  
CDK6  
CHN2  
CPA2  
CLDN4  
CBX3  
CRCP  
CYCS  
CREB3L2  
EGFR  
EPO  
EPHB4  
EZH2  
GARS  
GRB10  
GTF2I  
HOXA7  
HSPB1  
HBP1  
H2AFV  
IL6  
INHBA  
INMT  
KCND2  
LEP  
MCM7  
MEST  
MEOX2  
NUDT1  
NOS3

NRF1  
POLD2  
PPIA  
PTPN12  
PDIA4  
PEG10  
PRKAG2  
RPA3  
RAMP3  
RAC1  
SLC26A3  
SERPINE1  
SP4  
SEMA3C  
SEC61G  
SND1  
SMURF1  
SFRP4  
TAC1  
TFPI2  
TRIM24  
TES  
TRIP6  
TSPAN13  
TRA2A  
TSC22D4  
THAP5  
VGF  
ZDHHC4  
AIM1  
AMD1  
ARG1  
AKAP12  
BAK1  
CDKN1A

CGA  
CNR1  
CRISP3  
CITED2  
CTGF  
CNKSR3  
EDN1  
EEF1A1  
ESR1  
ELOVL2  
ELOVL5  
FKBP5  
FOXC1  
FRK  
FYN  
GJA1  
GABRR1  
HIST1H4C  
HIST1H3C  
HIST1H2AB  
HIST1H2BB  
JARID2  
MARCKS  
MAN1A1  
MCM3  
ME1  
MYB  
MTRF1L  
PGC  
PIM1  
PKIB  
PTPRK  
PRDM1  
PRIM2  
PBOV1

RPL10A  
RUNX2  
RANBP9  
SLC29A1  
SERPINB6  
SYNCRIP  
THBS2  
TPBG  
TPD52L1  
TULP1  
ARSB  
ADRB2  
ANKH  
BTF3  
CCNB1  
CDH18  
CTNND2  
CXCL14  
CSF1R  
CCT5  
DPYSL3  
DUSP1  
ENC1  
EGR1  
ELL2  
F12  
FLT4  
FGF18  
FST  
FAM53C  
GABRP  
GTF2H2  
GDNF  
GZMA  
HBEGF

HMGCR  
HMMR  
HSPA4  
HTR1A  
IL12B  
IRF1  
KIF20A  
LMAN2  
MAP1B  
MSX2  
NPM1  
NEUROG1  
N4BP3  
OSMR  
PIK3R1  
PITX1  
PPP2CA  
PRLR  
PTTG1  
PLK2  
PAM  
SLC26A2  
SMAD5  
SGCD  
SLC12A2  
ST8SIA4  
STC2  
SPARC  
SRD5A1  
SNX24  
TNPO1  
TAF9  
TBCA  
TCF7  
TRIP13

TCERG1  
TGFB1  
TMED7  
WDR41  
AFP  
ALB  
ANXA3  
AREG  
ART3  
ABCE1  
ANKRD17  
CCNG2  
CLCN3  
CTBP1  
CXCL1  
CXCL2  
CPE  
CXCL10  
DCK  
EXOSC9  
FGB  
GNRHR  
GRIA2  
GRID2  
GUCY1B3  
H2AFZ  
HMGB2  
HPGD  
ING2  
INPP4B  
IGJ  
KDR  
KIT  
KCNIP4  
MAD2L1



MXD4  
MSX1  
MAPK10  
NPY1R  
PPBP  
PCGF3  
PAICS  
PDLIM5  
PTTG2  
PKD2  
PROL1  
SCARB2  
S100P  
SPRY1  
SFRP2  
SLC39A8  
SLC25A4  
TLR2  
TSPAN5  
TACC3  
AHSG  
ALCAM  
APOD  
ATP2B2  
ABCC5  
ABHD5  
ATP13A3  
BCL6  
CBLB  
CD86  
CCR1  
CCR2  
CP  
CLDN1  
CCR5

CCK  
EDEM1  
EPHA3  
FOXP1  
GNL3  
HES1  
IMPDH2  
IFRD2  
KCNAB1  
KCNMB3  
LTF  
LRRFIP2  
LAMB2  
LRCH3  
LRRC15  
MBNL1  
MCM2  
MASP1  
MRPL3  
MME  
OXTR  
PLOD2  
PRKCD  
PTPRG  
PIK3CA  
PPARG  
PTX3  
PDZRN3  
PHF7  
PHLDB2  
RPSA  
RPL15  
RPL14  
ROBO1  
RARB

SATB1  
SSR3  
SEMA3B  
SH3BP5  
SERPINI1  
STAB1  
SEC61A1  
SEMA5B  
SNRK  
THPO  
TKT  
TMF1  
TNFSF10  
THRB  
UMPS  
WNT5A  
WNT7A  
ADCY3  
ALPP  
APOB  
ATP5G3  
AGPS  
ACTG2  
ANXA4  
ANKRD44  
BZW1  
BCL2L11  
CALM2  
CCNT2  
CD8A  
CENPA  
CPS1  
CTNNA2  
CYP1B1  
CCT7

CCT4  
CLK1  
COL3A1  
COL6A3  
CDCA7  
COX5B  
COMMD1  
DTYMK  
DBI  
DNER  
EEF1B2  
EPHA4  
EFEMP1  
EPB41L5  
FOSL2  
FEZ2  
FAM84A  
GFPT1  
GPD2  
GREB1  
HOXD4  
HSPD1  
HAT1  
HDAC4  
HSPE1  
HPCAL1  
ID2  
IGFBP5  
IL1R1  
INHBB  
IRS1  
ITGAV  
IL1R2  
IL1RL2  
ITGB1BP1

IGFBP2  
ITGA4  
ITGA6  
KYNU  
KCNK3  
KHK  
KIF3C  
MXD1  
MYO1B  
MTHFD2  
MCM6  
NEB  
NRP2  
PDCD1  
PRKCE  
PSMD1  
PTMA  
PAX8  
PTPN18  
RAB1A  
RRM2  
RAMP1  
RIF1  
RSAD2

2-Sep

SLC1A4  
SNRPG  
SOS1  
SMYD1  
SLC20A1  
SLC8A1  
SERPINE2  
TFPI  
TGFA  
TSN

TMSB10  
TRIB2  
UBE2E3  
WDR43  
WDFY1  
ZFP36L2  
ADORA1  
ALPL  
APOA2  
ATF3  
ANXA9  
ACTA1  
ARHGEF2  
BTG2  
BCAN  
BMP8A  
BMP8B  
CD34  
CD58  
CDC20  
COPA  
CRP  
CYP2J2  
CELSR2  
CYR61  
CCT3  
C1QB  
CFH  
CTSS  
CD52  
CLIC4  
CACYBP  
CKS1B  
C1ORF123  
C1ORF68

DHCR24  
DDOST  
DVL1  
ECE1  
EFNA1  
ENO1  
EXOSC10  
EXO1  
EDN2  
ENAH  
FAIM3  
F3  
FAM72A  
GABRD  
GCLM  
GNB1  
GADD45A  
GBP2  
GSTM1  
GSTM2  
GREM2  
H3F3A  
HSPA6  
HAX1  
HMGCS2  
HEATR1  
IFI16  
ILF2  
IRF6  
IL6R  
JUN  
KCND3  
KCNK2  
KIF2C  
KIFAP3

LEPR  
MPL  
MUC1  
MKNK1  
MAPKAPK2

2-Mar

MRPS14  
NFIA  
NHLH2  
NRAS  
NTNG1  
NASP  
PARP1  
PDE4B  
PDZK1  
PLXNA2  
PSEN2  
PSMB4  
PTGER3  
PTGS2  
PIK3R3  
PTPRU  
PBX1  
PADI1  
PIGR  
PHGDH  
RHOC  
RERE  
RGS2  
RPS6KA1  
RSC1A1  
RBM8A  
RPA2  
RUSC1  
RHOU



STMN1  
S100A9  
S100A10  
SFPQ  
SLC2A1  
SNRPE  
SELENBP1  
SF3A3  
SKI  
SLC16A1  
SPRR2A  
SPRR2B  
SPRR2E  
SPRR2F  
SPRR2G  
SRM  
SSBP3  
SCP2  
SEMA4A  
STX12  
TACSTD2  
TPM3  
TIMM17A  
TXNIP  
TBX15  
UBE2T  
UOX  
VCAM1  
WNT3A  
WNT4  
YBX1  
YARS
