# Supplementary material
Source: PubMed Central journal article supplement (PMC5289864)
Supplement: 979TableS4.pdf [file 979TableS4.pdf]

---

**Table S4. Percentage of autosomal SNPs above additional FDR thresholds in the male, female and combined-sex datasets for WTCCC diseases**

---

| <b>% above FDR</b> | <b>FDR 0.1</b> | <b>FDR 0.3</b> | <b>FDR 0.5</b> | <b>FDR 0.7</b> | <b>FDR 0.9</b> |
|--------------------|----------------|----------------|----------------|----------------|----------------|
| <0.0001            | 13             | 9              | 6              | 4              | 2              |
| >1%                | 0              | 0              | 0              | 1              | 17             |

---

Abbreviations: % above FDR: percentage of SNPs above FDR threshold; FDR: False Discovery Rate
