# Supplementary material
Source: PubMed Central journal article supplement (PMC5289864)
Supplement: 979TableS5.pdf [file 979TableS5.pdf]

**Table S5. Comparison between the heritability estimated for WTCCC with REML implemented in GCTA and HE-regression model implemented in PCGC**

| Disease              | Male         |              |               |              | Female       |              |               |              | Z-score<br>(REML<br>M - F) | Z-score<br>(HE-reg<br>M - F) |
|----------------------|--------------|--------------|---------------|--------------|--------------|--------------|---------------|--------------|----------------------------|------------------------------|
|                      | REML         |              | HE-regression |              | REML         |              | HE-regression |              |                            |                              |
|                      | $h^2_g$      | SE           | $h^2_g$       | SE           | $h^2_g$      | SE           | $h^2_g$       | SE           |                            |                              |
| AS                   | 0.110        | 0.042        | 0.120         | 0.058        | 0.150        | 0.074        | 0.180         | 0.100        | -0.500                     | -0.500                       |
| BD                   | 0.180        | 0.081        | 0.350         | 0.127        | 0.220        | 0.057        | 0.380         | 0.082        | -0.400                     | -0.200                       |
| CAD                  | 0.250        | 0.090        | 0.290         | 0.121        | 0.500        | 0.219        | 0.700         | 0.349        | -1.100                     | -1.100                       |
| CD                   | 0.140        | 0.060        | 0.120         | 0.089        | 0.170        | 0.044        | 0.200         | 0.067        | -0.400                     | -0.700                       |
| HT                   | 0.180        | 0.209        | 0.250         | 0.296        | 0.730        | 0.166        | 0.850         | 0.234        | -2.100                     | -1.600                       |
| MS                   | 0.170        | 0.021        | 0.300         | 0.039        | 0.170        | 0.016        | 0.280         | 0.029        | -0.100                     | 0.400                        |
| RA                   | 0.200        | 0.105        | 0.240         | 0.154        | 0.080        | 0.049        | 0.100         | 0.069        | 1.100                      | 0.800                        |
| T1D                  | 0.140        | 0.060        | 0.170         | 0.090        | 0.080        | 0.061        | 0.130         | 0.082        | 0.800                      | 0.400                        |
| T2D                  | 0.310        | 0.120        | 0.480         | 0.177        | 0.370        | 0.148        | 0.560         | 0.205        | -0.300                     | -0.300                       |
| <b>meta-analysis</b> | <b>0.160</b> | <b>0.016</b> | <b>0.240</b>  | <b>0.027</b> | <b>0.170</b> | <b>0.013</b> | <b>0.260</b>  | <b>0.022</b> | -0.300                     | -0.400                       |

Abbreviations:  $h^2_g$ , heritability; SE standard error.
