# Supplementary material
Source: PubMed Central journal article supplement (PMC5289864)
Supplement: 979TableS6.pdf [file 979TableS6.pdf]

**Table S6. Sex-differences in association signal and heterogeneity in WTCCC diseases**

| Disease | prev<br>M:F | association            |                   |                     |                   | heterogeneity           |                     |
|---------|-------------|------------------------|-------------------|---------------------|-------------------|-------------------------|---------------------|
|         |             | Autosomes <sup>s</sup> |                   | HLA <sup>s</sup>    |                   | Autosomes <sup>^s</sup> | HLA <sup>^s</sup>   |
|         |             | M P                    | F P               | M P                 | F P               | P                       | P                   |
| AS      | 2:1         | NS                     | 0.08 <sup>#</sup> | <0.001 <sup>#</sup> | 0.08 <sup>#</sup> | NS                      | NS                  |
| BD      | 1:1         | NS                     | NS                | -                   | -                 | NS                      | -                   |
| CAD     | 1:1         | NS                     | NS                | -                   | -                 | NS                      | -                   |
| CD      | 1:1         | NS                     | NS                | NS                  | 0.07 <sup>#</sup> | 0.09 <sup>#</sup>       | NS                  |
| HT      | 1:1         | NS                     | NS                | -                   | -                 | NS                      | -                   |
| MS      | 1:3         | NS                     | NS                | NS                  | NS                | NS                      | <0.001 <sup>#</sup> |
| RA      | 1:2         | NS                     | NS                | NS                  | 0.08 <sup>#</sup> | NS                      | NS                  |
| T1D     | 3:2         | NS                     | NS                | NS                  | 0.07 <sup>#</sup> | NS                      | NS                  |
| T2D     | 1:1         | NS                     | NS                | -                   | -                 | NS                      | -                   |

Abbreviations: prev ratio in prevalence

<sup>s</sup> Empirical p-value estimation based on 100 permutations

<sup>^</sup> Cochran test for heterogeneity

<sup>#</sup> Empirical P ≤ 0.1 were replaced with empirical p-values estimated with 1,000 permutations
