# Supplementary material
Source: PubMed Central journal article supplement (PMC5289864)
Supplement: 979TableS7.pdf [file 979TableS7.pdf]

**Table S7. Sex-differences in chromosome X, 7 and 17 association to WTCCC diseases**

| <b>Disease<br/>s</b> | <b>X-chromosome<sup>s</sup></b> |                    | <b>Chromosome 7<sup>s</sup></b> |                    | <b>Chromosome 17<sup>s</sup></b> |           |
|----------------------|---------------------------------|--------------------|---------------------------------|--------------------|----------------------------------|-----------|
|                      | <i>MP</i>                       | <i>FP</i>          | <i>MP</i>                       | <i>FP</i>          | <i>MP</i>                        | <i>FP</i> |
| AS                   | 0.050 <sup>#</sup>              | NS                 | NS                              | NS                 | NS                               | NS        |
| BD                   | NS                              | NS                 | NS                              | NS                 | NS                               | NS        |
| CAD                  | 0.037 <sup>#</sup>              | NS                 | NS                              | NS                 | NS                               | NS        |
| CD                   | NS                              | NS                 | NS                              | NS                 | NS                               | NS        |
| HT                   | NS                              | NS                 | NS                              | NS                 | NS                               | NS        |
| MS                   | NS                              | NS                 | NS                              | NS                 | NS                               | NS        |
| RA                   | NS                              | 0.100 <sup>#</sup> | NS                              | NS                 | NS                               | NS        |
| T1D                  | NS                              | NS                 | NS                              | NS                 | NS                               | NS        |
| T2D                  | NS                              | NS                 | NS                              | 0.046 <sup>#</sup> | NS                               | NS        |

<sup>s</sup> Empirical p-value estimation based on 100 permutations

<sup>#</sup> Empirical p-values  $\leq 0.1$  were replaced with empirical p-values estimated with 1,000 permutations
