# Supplementary material
Source: PubMed Central journal article supplement (PMC5289864)
Supplement: 979TableS8.pdf [file 979TableS8.pdf]

**Table S8. Disproportionate contribution of androgen- (AR) and estrogen- (ER) responsive genes and of sex-heterogeneous markers to WTCCC diseases and GIANT anthropometric traits**

| <b>Disease/Trait</b> | <b>AR<sup>^</sup></b>           | <b>ER<sup>^</sup></b>        | <b>Heterogeneous SNPs<sup>^</sup></b>                        |
|----------------------|---------------------------------|------------------------------|--------------------------------------------------------------|
|                      | <b>P<sup>s</sup></b>            | <b>P<sup>s</sup></b>         | <b>P<sup>s</sup></b>                                         |
| AS*                  | NS                              | NS                           | NS                                                           |
| BD                   | NS                              | NS                           | <0.001 <sup>#</sup> (females)                                |
| CAD                  | NS                              | 0.032 <sup>#</sup> (females) | <0.001 <sup>#</sup> (males)                                  |
| CD*                  | 0.023 <sup>#</sup> (all)        | 0.068 <sup>#</sup> (males)   | <0.001 <sup>#</sup> (females)                                |
| HT                   | NS                              | NS                           | NS                                                           |
| MS*                  | NS                              | NS                           | NS                                                           |
| RA*                  | <0.001 <sup>#</sup> (all)       | NS                           | <0.001 <sup>#</sup> (males)                                  |
| T1D*                 | 0.084 <sup>#</sup> (all)        | 0.016 <sup>#</sup> (females) | NS <sup>#</sup> (all)                                        |
| T2D                  | NS                              | NS                           | <0.001 <sup>#</sup> (males);<br>0.034 <sup>#</sup> (females) |
| BMI                  | NS                              | NS                           | <0.001 <sup>#</sup> (all)                                    |
| HIP                  | 0.093 <sup>#</sup> (males)      | NS                           | <0.001 <sup>#</sup> (all)                                    |
| HIP-a                | <0.001 (all)                    | NS                           | <0.001 <sup>#</sup> (all)                                    |
| WC                   | NS                              | NS                           | <0.001 <sup>#</sup> (all)                                    |
| WC-a                 | <0.001 <sup>#</sup> (males)     | <0.001 <sup>#</sup> (all)    | <0.001 <sup>#</sup> (all)                                    |
| WHR                  | 0.041 <sup>#</sup><br>(females) | NS                           | <0.001 <sup>#</sup> (all)                                    |
| WHR-a                | <0.001 <sup>#</sup> (all)       | 0.034 <sup>#</sup> (males)   | <0.001 <sup>#</sup> (all)                                    |
| Height               | <0.001 <sup>#</sup> (all)       | NS                           | <0.001 <sup>#</sup> (all)                                    |
| Weight               | 0.026 <sup>#</sup> (males)      | NS                           | <0.001 <sup>#</sup> (all)                                    |

Abbreviations: AR androgen-responsive genes; ER estrogen-responsive genes; P p-value; NS not significant

<sup>^</sup> The AR genes and ER genes covered 6% and 3% of the total SNPs, respectively; Heterogeneous SNPs were 0.01% of all SNPs

<sup>#</sup> Empirical P < 0.1 were replaced with empirical p-values estimated with 1,000 permutations
