# Supplementary material
Source: PubMed Central journal article supplement (PMC5289864)
Supplement: 979TableS9.pdf [file 979TableS9.pdf]

**Table S9. Partitioning contribution of androgen- (AR) and estrogen- (ER) responsive genes and of sex-heterogeneous markers to sex-combined, male and female heritability in WTCCC diseases**

| Diseases | AR <sup>s</sup>                         |                                       |                                       | ER <sup>s</sup>                         |                                       |                                       | Heterogeneous SNPs <sup>s</sup>         |                                       |                                       | P <sup>s</sup>       |
|----------|-----------------------------------------|---------------------------------------|---------------------------------------|-----------------------------------------|---------------------------------------|---------------------------------------|-----------------------------------------|---------------------------------------|---------------------------------------|----------------------|
|          | All h <sup>2</sup> <sub>g</sub><br>(SE) | M h <sup>2</sup> <sub>g</sub><br>(SE) | F h <sup>2</sup> <sub>g</sub><br>(SE) | All h <sup>2</sup> <sub>g</sub><br>(SE) | M h <sup>2</sup> <sub>g</sub><br>(SE) | F h <sup>2</sup> <sub>g</sub><br>(SE) | All h <sup>2</sup> <sub>g</sub><br>(SE) | M h <sup>2</sup> <sub>g</sub><br>(SE) | F h <sup>2</sup> <sub>g</sub><br>(SE) |                      |
| AS*      | 4% (4%)                                 | 8% (6%)                               | 1% (8%)                               | 4% (4%)                                 | 5% (5%)                               | 2% (6%)                               | -1% (2%)                                | 3% (4%)                               | 7% (6%)                               | NS                   |
| BD       | 6% (5%)                                 | 7% (14%)                              | 9% (8%)                               | -6% (3%)                                | -4% (10%)                             | -0.6% (5%)                            | -1% (3%)                                | -3% (8%)                              | -4% (5%)                              | NS                   |
| CAD      | 20% (10%)                               | 2% (14%)                              | 21% (12%)*                            | 7% (7%)                                 | -4% (1%)                              | 25% (11%)*                            | 1% (6%)                                 | 6% (8%)                               | -7% (6%)                              | NS                   |
| CD*      | 16% (6%)                                | 6% (12%)                              | -                                     | 6% (4%)                                 | 3% (9%)                               | -                                     | 1% (3%)                                 | 2% (7%)                               | -                                     | -                    |
| HT       | 2% (6%)                                 | 22% (40%)                             | 0% (7%)                               | 5% (5%)                                 | 32% (4%)                              | 6% (5%)                               | -2% (3%)                                | 60% (76%)                             | -6% (4%)                              | NS                   |
| MS*      | 5% (2%)                                 | 8% (3%)                               | 3% (2%)                               | 2% (1%)                                 | 6% (2%)                               | 1% (1%)                               | 1% (9%)                                 | 3% (3%)                               | 2% (1%)                               | 1.0x10 <sup>-2</sup> |
| RA*      | 19% (14%)                               | -18% (18%)                            | 37% (26%)*                            | 12% (9%)                                | -2% (11%)                             | 14% (14%)                             | -9% (7%)                                | 6% (1%)                               | -14% (12%)                            | 3.0x10 <sup>-2</sup> |
| T1D*     | 14% (9%)                                | 27% (15%)                             | 46% (47%)                             | 17% (8%)                                | 10% (10%)                             | 51% (43%)                             | 2% (5%)                                 | 4% (7%)                               | -3% (16%)                             | NS                   |
| T2D      | 6% (6%)                                 | 2% (13%)                              | 17% (11%)                             | 2% (4%)                                 | -6% (9%)                              | 8% *8%)                               | 1% (3%)                                 | -7% (7%)                              | 11% (7%)                              | 3.0x10 <sup>-2</sup> |

Abbreviations: h2g heritability; P p-value; SE standard error; NS not significant

<sup>s</sup> Empirical p-value for difference between M and F h2g, estimation based on 1,000 permutations

\* HLA locus was tested separately from the rest of the autosomes

% h2g computed as (h2g in category) / (h2g total) with corresponding standard error estimated using delta method

AR and ER genes covered 6% and 3% of SNPs, respectively. Heterogeneous SNPs were 0.01% of all SNPs

\*\*\* P<0.001; \*\* P<0.01; \* P<0.05; dashes indicate that estimates did not converge
