# Supplementary material
Source: PubMed Central journal article supplement (PMC5289864)
Supplement: 979TableS10.pdf [file 979TableS10.pdf]

**Table S10. Partitioning contribution of androgen- (AR) and estrogen- (ER) responsive genes and of conserved regions to male and female heritability in GIANT anthropometric traits.**

| Trait  | AR                          |                             |                                  | ER                          |                             |                                  | Conserved regions           |                             |                                    |
|--------|-----------------------------|-----------------------------|----------------------------------|-----------------------------|-----------------------------|----------------------------------|-----------------------------|-----------------------------|------------------------------------|
|        | M $h^2_g$ (SE) <sup>^</sup> | F $h^2_g$ (SE) <sup>^</sup> | $h^2_{gCORR}$ (SE) <sup>^^</sup> | M $h^2_g$ (SE) <sup>^</sup> | F $h^2_g$ (SE) <sup>^</sup> | $h^2_{gCORR}$ (SE) <sup>^^</sup> | M $h^2_g$ (SE) <sup>^</sup> | F $h^2_g$ (SE) <sup>^</sup> | $h^2_{gCORR}$ (SE) <sup>^^,§</sup> |
| BMI    | 9% (1%)                     | 7% (1%)*                    | 0.42 (0.28)*                     | 3% (1%)                     | 5% (1%)                     | 0.72 (0.32)                      | 47% (7%)*                   | 40% (6%)*                   | 0.63 (0.10)**                      |
| HIP    | 11% (2%)                    | 10% (2%)                    | 0.57 (0.22)*                     | 3% (1%)                     | 6% (1%)                     | -                                | 51% (9%)*                   | 32% (6%)*                   | 0.59 (0.13)**                      |
| HIP-a  | 14% (2%)                    | 16% (2%)                    | 0.77 (0.16)                      | 5% (1%)                     | 5% (1%)                     | 0.55 (0.28)                      | 30% (7%)**                  | 37% (6%)*                   | 0.81 (0.17)                        |
| WC     | 09% (2%)                    | 08% (1%)                    | 0.91 (0.44)                      | 4% (0%)                     | 6% (1%)                     | 0.66 (0.39)                      | 54% (9%)*                   | 44% (8%)*                   | 0.52 (0.12)*                       |
| WC-a   | 02% (2%)                    | 16% (3%)                    | 0.72 (0.13)*                     | 6% (1%)                     | 9% (2%)                     | 0.74 (0.22)                      | 44% (7%)*                   | 40% (8%)*                   | -                                  |
| WHR    | 09% (2%)                    | 12% (3%)                    | 0.59 (0.22)*                     | 07% (2%)                    | 5% (2%)                     | 0.61 (0.48)                      | 55% (8%)*                   | 53% (9%)*                   | 0.46 (0.12)*                       |
| WHR-a  | 14% (3%)                    | 16% (3%)                    | 0.42 (0.13)*                     | 09% (2%)*                   | 6% (2%)                     | 0.48 (0.28)*                     | 46% (9%)*                   | 47% (9%)*                   | -                                  |
| HEIGHT | 18% (2%)*                   | 18% (2%)*                   | 0.66 (0.12)**                    | 5% (1%)                     | 6% (2%)                     | 0.83 (0.28)                      | 35% (6%)*                   | 35% (6%)*                   | -                                  |
| WEIGHT | 13% (2%)                    | 09% (2%)                    | 0.26 (0.14)*                     | 2% (1%)*                    | 6% (1%)                     | -                                | 44% (8%)*                   | 41% (7%)*                   | 0.67 (0.15)                        |

Abbreviations:  $h^2_g$  heritability;  $h^2_{gCORR}$  genetic correlation.

<sup>^</sup> p-value on the coefficient of enrichment measured jointly with 51 known functional categories (including genic and regulatory)

<sup>^^</sup> p-value on the observed genetic correlation being different from 1.0

<sup>§</sup> reported if significant after accounting for 51 annotations tested

%  $h^2_g$  computed as ( $h^2_g$  in category) / ( $h^2_g$  total) with corresponding standard error estimated using delta method

AR and ER genes covered 6% and 3% of SNPs, respectively.
