# Supplementary material
Source: PubMed Central journal article supplement (PMC5289864)
Supplement: 979TableS11.pdf [file 979TableS11.pdf]

**Table S11. Partitioning contribution of androgen (AR) and estrogen (ER) responsive-genes in GIANT anthropometric traits with "baseline" model.**

| Trait  | AR                          |                             | ER                          |                             |
|--------|-----------------------------|-----------------------------|-----------------------------|-----------------------------|
|        | M $h^2_g$ (SE) <sup>^</sup> | F $h^2_g$ (SE) <sup>^</sup> | M $h^2_g$ (SE) <sup>^</sup> | F $h^2_g$ (SE) <sup>^</sup> |
| BMI    | 8% (1%)                     | 6% (1%)*                    | 3% (1%)                     | 5% (1%)                     |
| HIP    | 8% (1%)                     | 8% (1%)                     | 3% (1%)                     | 5% (1%)                     |
| HIP-a  | 10% (1%)                    | 10% (1%)                    | 4% (1%)                     | 4% (1%)                     |
| WC     | 8% (1%)                     | 7% (1%)                     | 3% (1%)                     | 5% (1%)                     |
| WC-a   | 12% (2%)                    | 10% (1%)                    | 5% (1%)                     | 6% (1%)                     |
| WHR    | 7% (2%)                     | 8% (1%)                     | 5% (1%)                     | 4% (1%)                     |
| WHR-a  | 9% (2%)                     | 9% (2%)                     | 7% (1%)*                    | 4% (1%)                     |
| HEIGHT | 13% (1%)*                   | 13% (1%)*                   | 4% (1%)                     | 5% (1%)                     |
| WEIGHT | 12% (1%)                    | 7% (1%)                     | 3% (1%)*                    | 5% (1%)                     |

Abbreviations:  $h^2_g$  heritability; \*\*\* P<0.001; \* P<0.05; conditional on baseline model

%  $h^2_g$  computed as ( $h^2_g$  in category) / ( $h^2_g$  total) with corresponding standard error estimated using delta method

<sup>^</sup> P-value on the coefficient of enrichment measured jointly with 51 known functional categories (including genic and regulatory)
