# Supplementary material
Source: PubMed Central journal article supplement (PMC5289864)
Supplement: 979TableS12.pdf [file 979TableS12.pdf]

**Table S12. Disease prevalence for a range of thresholds and variances of liability distribution with mean 0**

| <b>variance of liability</b> | <b>t=1.644854</b> | <b>t=1.959964</b> | <b>t=2.326348</b> | <b>t=2.575829</b> | <b>t=3.090232</b> |
|------------------------------|-------------------|-------------------|-------------------|-------------------|-------------------|
| 1                            | 0.05              | 0.025             | 0.01              | 0.005             | 0.001             |
| 1.1                          | 0.05840482        | 0.03082864        | 0.0132745         | 0.007025501       | 0.001607373       |
| 1.2                          | 0.0666081         | 0.03679178        | 0.01684949        | 0.009351466       | 0.002393835       |
| 1.3                          | 0.07456207        | 0.04280699        | 0.02065813        | 0.01193697        | 0.003360987       |
| 1.4                          | 0.0822409         | 0.04881315        | 0.02464221        | 0.01474129        | 0.004504361       |
| 1.5                          | 0.08963318        | 0.05476559        | 0.02875233        | 0.01772608        | 0.005815205       |
| 1.6                          | 0.09673693        | 0.06063228        | 0.03294734        | 0.02085651        | 0.007281998       |
| 1.7                          | 0.1035563         | 0.06639068        | 0.03719336        | 0.0241017         | 0.008891638       |
| 1.8                          | 0.1100991         | 0.07202544        | 0.04146283        | 0.02743465        | 0.01063033        |
| 1.9                          | 0.1163755         | 0.07752658        | 0.04573344        | 0.03083207        | 0.01248424        |
| 2                            | 0.1223971         | 0.08288814        | 0.04998734        | 0.03427407        | 0.01443987        |

Abbreviations:  $t$  is the threshold in the liability model; values in the table are the disease prevalence for the specified threshold and liability variance computed as the cdf of the normal distribution above the threshold.
